# Supplementary material for: Four-dimensional lipidomics profiling in X-linked adrenoleukodystrophy using trapped ion mobility mass spectrometry
Source: PubMed Central journal article supplement (PMC11234049; doi:10.1016/j.jlr.2024.100567), 2024-05-23
Supplement: mmc3.pdf [file mmc3.pdf]

## Overall study design

|                        |                                                                                                                     |                                         |                             |
|------------------------|---------------------------------------------------------------------------------------------------------------------|-----------------------------------------|-----------------------------|
| Title of the study     | Four-dimensional Lipidomics Profiling in X-linked Adrenoleukodystrophy using Trapped Ion Mobility Mass Spectrometry |                                         |                             |
| Document creation date | 04/15/2024                                                                                                          | Corresponding Email                     | y.r.jaspers@amsterdamumc.nl |
| Principle investigator | Yorrick R.J. Jaspers                                                                                                | Is the workflow targeted or untargeted? | Untargeted                  |
| Institution            | Amsterdam UMC                                                                                                       | Clinical                                | No                          |

## Lipid extraction

|                   |                |                                                 |                               |
|-------------------|----------------|-------------------------------------------------|-------------------------------|
| Extraction method | 1-phase system | 1-phase system                                  | 1:1 (v/v) methanol:chloroform |
| Derivatization    | -              | Were internal standards added prior extraction? | Yes                           |
| pH adjustment     | None           |                                                 |                               |

## Analytical platform

|                                 |                               |                                                                        |                 |
|---------------------------------|-------------------------------|------------------------------------------------------------------------|-----------------|
| Ionization additives            | Ammonium acetate, Formic acid | MS Level                                                               | MS2             |
| Number of separation dimensions | One dimension                 | Mass window for precursor ion isolation (in Da total isolation window) | 1               |
| Separation type 1               | LC                            | Mass resolution for detected ion at MS2                                | High resolution |
| Separation mode 1 (liquid)      | RP                            | Resolution at m/z 200 at MS2                                           | 60000           |
| Detector                        | Mass spectrometer             | Mass accuracy in ppm at MS2                                            | 4               |
| MS type                         | timsTOF Pro2                  | Recording mode of raw data at MS2                                      | Profile mode    |
| MS vendor                       | Bruker                        | Was/Were additional dimension/techniques used                          | Yes             |
| Ion source                      | HESI                          |                                                                        |                 |

## Quality control

|                |                                 |                   |             |
|----------------|---------------------------------|-------------------|-------------|
| Blanks         | Yes                             | Quality control   | Yes         |
| Type of Blanks | Extraction blank, Solvent blank | Type of QC sample | Sample pool |

## Method qualification and validation

|                   |    |
|-------------------|----|
| Method validation | No |
|-------------------|----|

## Reporting

|                                                 |                      |                     |                      |
|-------------------------------------------------|----------------------|---------------------|----------------------|
| Are reported raw data uploaded into repository? | Available on request | Raw data upload     | Available on request |
| Are metadata available?                         | Available on request | Additional comments | -                    |

## Sample Descriptions

### Fibroblasts / Human / Cells

|                                      |         |                                      |      |
|--------------------------------------|---------|--------------------------------------|------|
| Provided information                 | -       | Additives                            | None |
| Temperature handling original sample | Unknown | Were samples stored under inert gas? | No   |
| Instant sample preparation           | No      | Additional preservation methods      | No   |
| Storage temperature                  | -80 °C  | Biobank samples                      | No   |

# Lipid Class Descriptions

## 1) LPC[M+H]<sup>+</sup> / Lipid identification

|                                                 |                    |                                                        |                                                                                                                                                                                                                                                         |
|-------------------------------------------------|--------------------|--------------------------------------------------------|---------------------------------------------------------------------------------------------------------------------------------------------------------------------------------------------------------------------------------------------------------|
| Lipid class                                     | LPC                | Limit of detection                                     | No                                                                                                                                                                                                                                                      |
| MS Level for identification                     | MS1, MS2           | RT verified by standard                                | Yes                                                                                                                                                                                                                                                     |
| Identification level                            | sn Position        | Separation of isobaric/isomeric interference confirmed | No                                                                                                                                                                                                                                                      |
| Polarity mode                                   | Positive           | Model for separation prediction                        | No                                                                                                                                                                                                                                                      |
| Type of positive (precursor)ion                 | [M+H] <sup>+</sup> | Additional dimension/techniques                        | IMS                                                                                                                                                                                                                                                     |
| Fragments for identification                    |                    | CCS verified by standard                               | No                                                                                                                                                                                                                                                      |
| <b>Fragment name</b><br>HG(PC,184)              |                    |                                                        |                                                                                                                                                                                                                                                         |
| Isotope correction at MS1                       | No                 | How was/were the additional dimension(s) used?         | CCS was used (in combination with other parameters) in the identification of lipids, separation of potential isobaric/isomeric interference.                                                                                                            |
| Isotope correction at MS2                       | No                 | Was a model used to predict lipid molecule separation? | No                                                                                                                                                                                                                                                      |
| MS1 verified by standard                        | Yes                | Lipid Identification Software                          | Lipid identification was done using MetaboScape 2023b (Bruker Daltonics) utilizing an in-house generated retention time and m/z database, rule-based lipid annotation and the MS DIAL MS/MS library LipidBlast (version 68).                            |
| MS2 verified by standard                        | Yes                | Data manipulation                                      | -                                                                                                                                                                                                                                                       |
| Background check at MS1                         | Yes                | Nomenclature for intact lipid molecule                 | Yes                                                                                                                                                                                                                                                     |
| Background check at MS2                         | No                 | Nomenclature for fragment ions                         | N/A                                                                                                                                                                                                                                                     |
| Did you presume assumptions for identification? | No                 | Further identification remarks                         | For lipid identification, the Lipidomics Standards Initiative guidelines were followed, employing lipid class-specific fragments to determine the lipid species and molecular lipid species-specific fragments for the annotation of hydrocarbon chains |
| Check isomer overlap                            | Yes                |                                                        |                                                                                                                                                                                                                                                         |

## 1) LPC[M+H]<sup>+</sup> / Lipid quantification

|                            |    |                                |                                                                                                                                                   |
|----------------------------|----|--------------------------------|---------------------------------------------------------------------------------------------------------------------------------------------------|
| Quantitative               | No | Batch correction               | No                                                                                                                                                |
| Normalization to reference | No | Further quantification remarks | The reported lipid abundances were semi-quantitative, calculated by dividing the analyte response by that of the corresponding internal standard. |

## 2) PC[M+H]<sup>+</sup> / Lipid identification

|                                                 |                                                                                                              |                                                        |                                                                                                                                                                                                                                                          |
|-------------------------------------------------|--------------------------------------------------------------------------------------------------------------|--------------------------------------------------------|----------------------------------------------------------------------------------------------------------------------------------------------------------------------------------------------------------------------------------------------------------|
| Lipid class                                     | PC                                                                                                           | Limit of detection                                     | No                                                                                                                                                                                                                                                       |
| MS Level for identification                     | MS1, MS2                                                                                                     | RT verified by standard                                | Yes                                                                                                                                                                                                                                                      |
| Identification level                            | Molecular species level                                                                                      | Separation of isobaric/isomeric interferece confirmed  | No                                                                                                                                                                                                                                                       |
| Polarity mode                                   | Positive                                                                                                     | Model for separation prediction                        | No                                                                                                                                                                                                                                                       |
| Type of positive (precursor)ion                 | [M+H] <sup>+</sup>                                                                                           | Additional dimension/techniques                        | IMS                                                                                                                                                                                                                                                      |
| Fragments for identification                    | <p>Fragment name</p> <p>HG(PC,184)</p> <p>-FA1 (+HO)</p> <p>-FA1 (-H)</p> <p>-FA2 (+HO)</p> <p>-FA2 (-H)</p> | CCS verified by standard                               | No                                                                                                                                                                                                                                                       |
| Isotope correction at MS1                       | No                                                                                                           | How was/were the additional dimension(s) used?         | CCS was used (in combination with other parameters) in the identification of lipids, separation of potential isobaric/isomeric interference.                                                                                                             |
| Isotope correction at MS2                       | No                                                                                                           | Was a model used to predict lipid molecule separation? | No                                                                                                                                                                                                                                                       |
| MS1 verified by standard                        | Yes                                                                                                          | Lipid Identification Software                          | Lipid identification was done using MetaboScape 2023b (Bruker Daltonics) utilizing an in-house generated retention time and m/z database, rule-based lipid annotation and the MS DIAL MS/MS library LipidBlast (version 68).                             |
| MS2 verified by standard                        | No                                                                                                           | Data manipulation                                      | -                                                                                                                                                                                                                                                        |
| Background check at MS1                         | Yes                                                                                                          | Nomenclature for intact lipid molecule                 | Yes                                                                                                                                                                                                                                                      |
| Background check at MS2                         | No                                                                                                           | Nomenclature for fragment ions                         | N/A                                                                                                                                                                                                                                                      |
| Did you presume assumptions for identification? | No                                                                                                           | Further identification remarks                         | For lipid identification, the Lipidomics Standards Initiative guidelines were followed, employing lipid class-specific fragments to determine the lipid species and molecular lipid species-specific fragments for the annotation of hydrocarbon chains. |
| Check isomer overlap                            | Yes                                                                                                          |                                                        |                                                                                                                                                                                                                                                          |

## 2) PC[M+H]<sup>+</sup> / Lipid quantification

|                            |    |                                |                                                                                                                                                   |
|----------------------------|----|--------------------------------|---------------------------------------------------------------------------------------------------------------------------------------------------|
| Quantitative               | No | Batch correction               | No                                                                                                                                                |
| Normalization to reference | No | Further quantification remarks | The reported lipid abundances were semi-quantitative, calculated by dividing the analyte response by that of the corresponding internal standard. |

### 3) TG[M+NH4]<sup>+</sup> / Lipid identification

|                                                 |                         |                                                        |                                                                                                                                                                                                                                                          |
|-------------------------------------------------|-------------------------|--------------------------------------------------------|----------------------------------------------------------------------------------------------------------------------------------------------------------------------------------------------------------------------------------------------------------|
| Lipid class                                     | TG                      | Limit of detection                                     | No                                                                                                                                                                                                                                                       |
| MS Level for identification                     | MS1, MS2                | RT verified by standard                                | Yes                                                                                                                                                                                                                                                      |
| Identification level                            | Molecular species level | Separation of isobaric/isomeric interferece confirmed  | No                                                                                                                                                                                                                                                       |
| Polarity mode                                   | Positive                | Model for separation prediction                        | No                                                                                                                                                                                                                                                       |
| Type of positive (precursor)ion                 | [M+NH4] <sup>+</sup>    | Additional dimension/techniques                        | IMS                                                                                                                                                                                                                                                      |
| Fragments for identification                    |                         | CCS verified by standard                               | No                                                                                                                                                                                                                                                       |
| Fragment name                                   |                         |                                                        |                                                                                                                                                                                                                                                          |
| -FA(+HO) -TG(17)                                |                         |                                                        |                                                                                                                                                                                                                                                          |
| -TG(17)                                         |                         |                                                        |                                                                                                                                                                                                                                                          |
| Isotope correction at MS1                       | No                      | How was/were the additional dimension(s) used?         | CCS was used (in combination with other parameters) in the identification of lipids, separation of potential isobaric/isomeric interference.                                                                                                             |
| Isotope correction at MS2                       | No                      | Was a model used to predict lipid molecule separation? | No                                                                                                                                                                                                                                                       |
| MS1 verified by standard                        | Yes                     | Lipid Identification Software                          | Lipid identification was done using MetaboScape 2023b (Bruker Daltonics) utilizing an in-house generated retention time and m/z database, rule-based lipid annotation and the MS DIAL MS/MS library LipidBlast (version 68).                             |
| MS2 verified by standard                        | No                      | Data manipulation                                      | -                                                                                                                                                                                                                                                        |
| Background check at MS1                         | Yes                     | Nomenclature for intact lipid molecule                 | Yes                                                                                                                                                                                                                                                      |
| Background check at MS2                         | No                      | Nomenclature for fragment ions                         | N/A                                                                                                                                                                                                                                                      |
| Did you presume assumptions for identification? | No                      | Further identification remarks                         | For lipid identification, the Lipidomics Standards Initiative guidelines were followed, employing lipid class-specific fragments to determine the lipid species and molecular lipid species-specific fragments for the annotation of hydrocarbon chains. |
| Check isomer overlap                            | Yes                     |                                                        |                                                                                                                                                                                                                                                          |

### 3) TG[M+NH4]<sup>+</sup> / Lipid quantification

|                            |    |                                |                                                                                                                                                   |
|----------------------------|----|--------------------------------|---------------------------------------------------------------------------------------------------------------------------------------------------|
| Quantitative               | No | Batch correction               | No                                                                                                                                                |
| Normalization to reference | No | Further quantification remarks | The reported lipid abundances were semi-quantitative, calculated by dividing the analyte response by that of the corresponding internal standard. |

#### 4) DG[M+NH4]<sup>+</sup> / Lipid identification

|                                                                                               |                         |                                                        |                                                                                                                                                                                                                                                          |
|-----------------------------------------------------------------------------------------------|-------------------------|--------------------------------------------------------|----------------------------------------------------------------------------------------------------------------------------------------------------------------------------------------------------------------------------------------------------------|
| Lipid class                                                                                   | DG                      | Limit of detection                                     | No                                                                                                                                                                                                                                                       |
| MS Level for identification                                                                   | MS1, MS2                | RT verified by standard                                | Yes                                                                                                                                                                                                                                                      |
| Identification level                                                                          | Molecular species level | Separation of isobaric/isomeric interference confirmed | No                                                                                                                                                                                                                                                       |
| Polarity mode                                                                                 | Positive                | Model for separation prediction                        | Yes                                                                                                                                                                                                                                                      |
| Type of positive (precursor)ion                                                               | [M+NH4] <sup>+</sup>    | Additional dimension/techniques                        | IMS                                                                                                                                                                                                                                                      |
| Fragments for identification                                                                  |                         | CCS verified by standard                               | No                                                                                                                                                                                                                                                       |
| <p>Fragment name</p> <p>-(H2O+NH3,35)</p> <p>-FA1(-H)-(H2O+NH3)</p> <p>-FA2(-H)-(H2O+NH3)</p> |                         |                                                        |                                                                                                                                                                                                                                                          |
| Isotope correction at MS1                                                                     | No                      | How was/were the additional dimension(s) used?         | CCS was used (in combination with other parameters) in the identification of lipids, separation of potential isobaric/isomeric interference.                                                                                                             |
| Isotope correction at MS2                                                                     | No                      | Was a model used to predict lipid molecule separation? | No                                                                                                                                                                                                                                                       |
| MS1 verified by standard                                                                      | Yes                     | Lipid Identification Software                          | Lipid identification was done using MetaboScape 2023b (Bruker Daltonics) utilising an in-house generated retention time and m/z database, rule-based lipid annotation and the MS DIAL MS/MS library LipidBlast (version 68).                             |
| MS2 verified by standard                                                                      | No                      | Data manipulation                                      | -                                                                                                                                                                                                                                                        |
| Background check at MS1                                                                       | Yes                     | Nomenclature for intact lipid molecule                 | Yes                                                                                                                                                                                                                                                      |
| Background check at MS2                                                                       | No                      | Nomenclature for fragment ions                         | N/A                                                                                                                                                                                                                                                      |
| Did you presume assumptions for identification?                                               | No                      | Further identification remarks                         | For lipid identification, the Lipidomics Standards Initiative guidelines were followed, employing lipid class-specific fragments to determine the lipid species and molecular lipid species-specific fragments for the annotation of hydrocarbon chains. |
| Check isomer overlap                                                                          | Yes                     |                                                        |                                                                                                                                                                                                                                                          |

#### 4) DG[M+NH4]<sup>+</sup> / Lipid quantification

|                            |    |                                |                                                                                                                                                   |
|----------------------------|----|--------------------------------|---------------------------------------------------------------------------------------------------------------------------------------------------|
| Quantitative               | No | Batch correction               | No                                                                                                                                                |
| Normalization to reference | No | Further quantification remarks | The reported lipid abundances were semi-quantitative, calculated by dividing the analyte response by that of the corresponding internal standard. |

## 5) CE[M+NH4]<sup>+</sup> / Lipid identification

|                                                 |                         |                                                        |                                                                                                                                                                                                                                                          |
|-------------------------------------------------|-------------------------|--------------------------------------------------------|----------------------------------------------------------------------------------------------------------------------------------------------------------------------------------------------------------------------------------------------------------|
| Lipid class                                     | CE                      | Limit of detection                                     | No                                                                                                                                                                                                                                                       |
| MS Level for identification                     | MS1, MS2                | RT verified by standard                                | Yes                                                                                                                                                                                                                                                      |
| Identification level                            | Molecular species level | Separation of isobaric/isomeric interferece confirmed  | No                                                                                                                                                                                                                                                       |
| Polarity mode                                   | Positive                | Model for separation prediction                        | No                                                                                                                                                                                                                                                       |
| Type of positive (precursor)ion                 | [M+NH4] <sup>+</sup>    | Additional dimension/techniques                        | IMS                                                                                                                                                                                                                                                      |
| Fragments for identification                    |                         | CCS verified by standard                               | No                                                                                                                                                                                                                                                       |
| <b>Fragment name</b><br>-FA1 (+HO) -CE(17)      |                         |                                                        |                                                                                                                                                                                                                                                          |
| Isotope correction at MS1                       | No                      | How was/were the additional dimension(s) used?         | CCS was used (in combination with other parameters) in the identification of lipids, separation of potential isobaric/isomeric interference.                                                                                                             |
| Isotope correction at MS2                       | No                      | Was a model used to predict lipid molecule separation? | No                                                                                                                                                                                                                                                       |
| MS1 verified by standard                        | Yes                     | Lipid Identification Software                          | Lipid identification was done using MetaboScape 2023b (Bruker Daltonics) utilizing an in-house generated retention time and m/z database, rule-based lipid annotation and the MS DIAL MS/MS library LipidBlast (version 68).                             |
| MS2 verified by standard                        | Yes                     | Data manipulation                                      | -                                                                                                                                                                                                                                                        |
| Background check at MS1                         | Yes                     | Nomenclature for intact lipid molecule                 | Yes                                                                                                                                                                                                                                                      |
| Background check at MS2                         | No                      | Nomenclature for fragment ions                         | N/A                                                                                                                                                                                                                                                      |
| Did you presume assumptions for identification? | No                      | Further identification remarks                         | For lipid identification, the Lipidomics Standards Initiative guidelines were followed, employing lipid class-specific fragments to determine the lipid species and molecular lipid species-specific fragments for the annotation of hydrocarbon chains. |
| Check isomer overlap                            | Yes                     |                                                        |                                                                                                                                                                                                                                                          |

## 5) CE[M+NH4]<sup>+</sup> / Lipid quantification

|                            |    |                                |                                                                                                                                                   |
|----------------------------|----|--------------------------------|---------------------------------------------------------------------------------------------------------------------------------------------------|
| Quantitative               | No | Batch correction               | No                                                                                                                                                |
| Normalization to reference | No | Further quantification remarks | The reported lipid abundances were semi-quantitative, calculated by dividing the analyte response by that of the corresponding internal standard. |

## 6) Cer[M+H]<sup>+</sup> / Lipid identification

|                                                 |                                                                                                                                                   |                                                        |                                                                                                                                                                                                                                                          |
|-------------------------------------------------|---------------------------------------------------------------------------------------------------------------------------------------------------|--------------------------------------------------------|----------------------------------------------------------------------------------------------------------------------------------------------------------------------------------------------------------------------------------------------------------|
| Lipid class                                     | Cer                                                                                                                                               | Limit of detection                                     | No                                                                                                                                                                                                                                                       |
| MS Level for identification                     | MS1, MS2                                                                                                                                          | RT verified by standard                                | Yes                                                                                                                                                                                                                                                      |
| Identification level                            | Molecular species level                                                                                                                           | Separation of isobaric/isomeric interference confirmed | No                                                                                                                                                                                                                                                       |
| Polarity mode                                   | Positive                                                                                                                                          | Model for separation prediction                        | No                                                                                                                                                                                                                                                       |
| Type of positive (precursor)ion                 | [M+H] <sup>+</sup>                                                                                                                                | Additional dimension/techniques                        | IMS                                                                                                                                                                                                                                                      |
| Fragments for identification                    | <p>Fragment name</p> <p>-(H<sub>2</sub>O,18)</p> <p>LCB(-HO)</p> <p>LCB(-H<sub>3</sub>O<sub>2</sub>)</p> <p>LCB(-CH<sub>3</sub>O<sub>2</sub>)</p> | CCS verified by standard                               | No                                                                                                                                                                                                                                                       |
| Isotope correction at MS1                       | No                                                                                                                                                | How was/were the additional dimension(s) used?         | CCS was used (in combination with other parameters) in the identification of lipids, separation of potential isobaric/isomeric interference.                                                                                                             |
| Isotope correction at MS2                       | No                                                                                                                                                | Was a model used to predict lipid molecule separation? | No                                                                                                                                                                                                                                                       |
| MS1 verified by standard                        | Yes                                                                                                                                               | Lipid Identification Software                          | Lipid identification was done using MetaboScape 2023b (Bruker Daltonics) utilizing an in-house generated retention time and m/z database, rule-based lipid annotation and the MS DIAL MS/MS library LipidBlast (version 68).                             |
| MS2 verified by standard                        | No                                                                                                                                                | Data manipulation                                      | -                                                                                                                                                                                                                                                        |
| Background check at MS1                         | Yes                                                                                                                                               | Nomenclature for intact lipid molecule                 | Yes                                                                                                                                                                                                                                                      |
| Background check at MS2                         | No                                                                                                                                                | Nomenclature for fragment ions                         | N/A                                                                                                                                                                                                                                                      |
| Did you presume assumptions for identification? | No                                                                                                                                                | Further identification remarks                         | For lipid identification, the Lipidomics Standards Initiative guidelines were followed, employing lipid class-specific fragments to determine the lipid species and molecular lipid species-specific fragments for the annotation of hydrocarbon chains. |
| Check isomer overlap                            | Yes                                                                                                                                               |                                                        |                                                                                                                                                                                                                                                          |

## 6) Cer[M+H]<sup>+</sup> / Lipid quantification

|                            |    |                                |                                                                                                                                                   |
|----------------------------|----|--------------------------------|---------------------------------------------------------------------------------------------------------------------------------------------------|
| Quantitative               | No | Batch correction               | No                                                                                                                                                |
| Normalization to reference | No | Further quantification remarks | The reported lipid abundances were semi-quantitative, calculated by dividing the analyte response by that of the corresponding internal standard. |



## 7) AC[M+H]<sup>+</sup> / Lipid identification

|                                                 |                    |                                                        |                                                                                                                                                                                                                                                          |
|-------------------------------------------------|--------------------|--------------------------------------------------------|----------------------------------------------------------------------------------------------------------------------------------------------------------------------------------------------------------------------------------------------------------|
| Lipid class                                     | AC                 | RT verified by standard                                | No                                                                                                                                                                                                                                                       |
| MS Level for identification                     | MS1                | Separation of isobaric/isomeric interference confirmed | No                                                                                                                                                                                                                                                       |
| Identification level                            | Species level      | Model for separation prediction                        | No                                                                                                                                                                                                                                                       |
| Polarity mode                                   | Positive           | Additional dimension/techniques                        | IMS                                                                                                                                                                                                                                                      |
| Type of positive (precursor)ion                 | [M+H] <sup>+</sup> | CCS verified by standard                               | No                                                                                                                                                                                                                                                       |
| Isotope correction at MS1                       | No                 | How was/were the additional dimension(s) used?         | CCS was used (in combination with other parameters) in the identification of lipids, separation of potential isobaric/isomeric interference.                                                                                                             |
| MS1 verified by standard                        | No                 | Was a model used to predict lipid molecule separation? | No                                                                                                                                                                                                                                                       |
| Background check at MS1                         | Yes                | Lipid Identification Software                          | Lipid identification was done using MetaboScape 2023b (Bruker Daltonics) utilizing an in-house generated retention time and m/z database, rule-based lipid annotation and the MS DIAL MS/MS library LipidBlast (version 68).                             |
| Did you presume assumptions for identification? | No                 | Data manipulation                                      | -                                                                                                                                                                                                                                                        |
| Check isomer overlap                            | Yes                | Nomenclature for intact lipid molecule                 | Yes                                                                                                                                                                                                                                                      |
| Limit of detection                              | No                 | Further identification remarks                         | For lipid identification, the Lipidomics Standards Initiative guidelines were followed, employing lipid class-specific fragments to determine the lipid species and molecular lipid species-specific fragments for the annotation of hydrocarbon chains. |

## 7) AC[M+H]<sup>+</sup> / Lipid quantification

|                            |    |                                |                                                                                                                                                   |
|----------------------------|----|--------------------------------|---------------------------------------------------------------------------------------------------------------------------------------------------|
| Quantitative               | No | Batch correction               | No                                                                                                                                                |
| Normalization to reference | No | Further quantification remarks | The reported lipid abundances were semi-quantitative, calculated by dividing the analyte response by that of the corresponding internal standard. |

## 8) DG O[M+NH4]<sup>+</sup> / Lipid identification

|                                                                     |                         |                                                        |                                                                                                                                                                                                                                                          |
|---------------------------------------------------------------------|-------------------------|--------------------------------------------------------|----------------------------------------------------------------------------------------------------------------------------------------------------------------------------------------------------------------------------------------------------------|
| Lipid class                                                         | DG O                    | Limit of detection                                     | No                                                                                                                                                                                                                                                       |
| MS Level for identification                                         | MS1, MS2                | RT verified by standard                                | No                                                                                                                                                                                                                                                       |
| Identification level                                                | Molecular species level | Separation of isobaric/isomeric interferece confirmed  | Yes                                                                                                                                                                                                                                                      |
| Polarity mode                                                       | Positive                | Model for separation prediction                        | No                                                                                                                                                                                                                                                       |
| Type of positive (precursor)ion                                     | [M+NH4] <sup>+</sup>    | Additional dimension/techniques                        | IMS                                                                                                                                                                                                                                                      |
| Fragments for identification                                        |                         | CCS verified by standard                               | No                                                                                                                                                                                                                                                       |
| <p>Fragment name</p> <p>-FA (-H)-(H2O+NH3)</p> <p>-(H2O+NH3,35)</p> |                         |                                                        |                                                                                                                                                                                                                                                          |
| Isotope correction at MS1                                           | No                      | How was/were the additional dimension(s) used?         | CCS was used (in combination with other parameters) in the identification of lipids, separation of potential isobaric/isomeric interference.                                                                                                             |
| Isotope correction at MS2                                           | No                      | Was a model used to predict lipid molecule separation? | No                                                                                                                                                                                                                                                       |
| MS1 verified by standard                                            | No                      | Lipid Identification Software                          | Lipid identification was done using MetaboScape 2023b (Bruker Daltonics) utilizing an in-house generated retention time and m/z database, rule-based lipid annotation and the MS DIAL MS/MS library LipidBlast (version 68).                             |
| MS2 verified by standard                                            | No                      | Data manipulation                                      | -                                                                                                                                                                                                                                                        |
| Background check at MS1                                             | Yes                     | Nomenclature for intact lipid molecule                 | Yes                                                                                                                                                                                                                                                      |
| Background check at MS2                                             | No                      | Nomenclature for fragment ions                         | N/A                                                                                                                                                                                                                                                      |
| Did you presume assumptions for identification?                     | No                      | Further identification remarks                         | For lipid identification, the Lipidomics Standards Initiative guidelines were followed, employing lipid class-specific fragments to determine the lipid species and molecular lipid species-specific fragments for the annotation of hydrocarbon chains. |
| Check isomer overlap                                                | Yes                     |                                                        |                                                                                                                                                                                                                                                          |

## 8) DG O[M+NH4]<sup>+</sup> / Lipid quantification

|                            |    |                                |    |
|----------------------------|----|--------------------------------|----|
| Quantitative               | No | Batch correction               | No |
| Normalization to reference | No | Further quantification remarks | -  |

## 9) Hex2Cer[M+H]<sup>+</sup> / Lipid identification

|                                                 |                                                                                                                                                           |                                                        |                                                                                                                                                                                                                                                          |
|-------------------------------------------------|-----------------------------------------------------------------------------------------------------------------------------------------------------------|--------------------------------------------------------|----------------------------------------------------------------------------------------------------------------------------------------------------------------------------------------------------------------------------------------------------------|
| Lipid class                                     | Hex2Cer                                                                                                                                                   | Limit of detection                                     | No                                                                                                                                                                                                                                                       |
| MS Level for identification                     | MS1, MS2                                                                                                                                                  | RT verified by standard                                | Yes                                                                                                                                                                                                                                                      |
| Identification level                            | Species level                                                                                                                                             | Separation of isobaric/isomeric interferece confirmed  | No                                                                                                                                                                                                                                                       |
| Polarity mode                                   | Positive                                                                                                                                                  | Model for separation prediction                        | No                                                                                                                                                                                                                                                       |
| Type of positive (precursor)ion                 | [M+H] <sup>+</sup>                                                                                                                                        | Additional dimension/techniques                        | IMS                                                                                                                                                                                                                                                      |
| Fragments for identification                    | <p>Fragment name</p> <p>-(H2O,18)</p> <p>LCB(-HO)</p> <p>LCB(-H3O2)</p> <p>LCB(-CH3O2)</p> <p>-HG(Hex2,342)</p> <p>-HG(Hex2,360)</p> <p>-HG(Hex2,324)</p> | CCS verified by standard                               | No                                                                                                                                                                                                                                                       |
| Isotope correction at MS1                       | No                                                                                                                                                        | How was/were the additional dimension(s) used?         | CCS was used (in combination with other parameters) in the identification of lipids, separation of potential isobaric/isomeric interference.                                                                                                             |
| Isotope correction at MS2                       | No                                                                                                                                                        | Was a model used to predict lipid molecule separation? | No                                                                                                                                                                                                                                                       |
| MS1 verified by standard                        | No                                                                                                                                                        | Lipid Identification Software                          | Lipid identification was done using MetaboScape 2023b (Bruker Daltonics) utilizing an in-house generated retention time and m/z database, rule-based lipid annotation and the MS DIAL MS/MS library LipidBlast (version 68).                             |
| MS2 verified by standard                        | No                                                                                                                                                        | Data manipulation                                      | -                                                                                                                                                                                                                                                        |
| Background check at MS1                         | Yes                                                                                                                                                       | Nomenclature for intact lipid molecule                 | Yes                                                                                                                                                                                                                                                      |
| Background check at MS2                         | No                                                                                                                                                        | Nomenclature for fragment ions                         | N/A                                                                                                                                                                                                                                                      |
| Did you presume assumptions for identification? | No                                                                                                                                                        | Further identification remarks                         | For lipid identification, the Lipidomics Standards Initiative guidelines were followed, employing lipid class-specific fragments to determine the lipid species and molecular lipid species-specific fragments for the annotation of hydrocarbon chains. |
| Check isomer overlap                            | Yes                                                                                                                                                       |                                                        |                                                                                                                                                                                                                                                          |

## 9) Hex2Cer[M+H]<sup>+</sup> / Lipid quantification

|                            |    |                                |                                                                                                                                                   |
|----------------------------|----|--------------------------------|---------------------------------------------------------------------------------------------------------------------------------------------------|
| Quantitative               | No | Batch correction               | No                                                                                                                                                |
| Normalization to reference | No | Further quantification remarks | The reported lipid abundances were semi-quantitative, calculated by dividing the analyte response by that of the corresponding internal standard. |

## 10) Hex3Cer[M+H]<sup>+</sup> / Lipid identification

|                                                 |                    |                                                        |                                                                                                                                                                                                                                                          |
|-------------------------------------------------|--------------------|--------------------------------------------------------|----------------------------------------------------------------------------------------------------------------------------------------------------------------------------------------------------------------------------------------------------------|
| Lipid class                                     | Hex3Cer            | Limit of detection                                     | No                                                                                                                                                                                                                                                       |
| MS Level for identification                     | MS1, MS2           | RT verified by standard                                | No                                                                                                                                                                                                                                                       |
| Identification level                            | Species level      | Separation of isobaric/isomeric interferece confirmed  | No                                                                                                                                                                                                                                                       |
| Polarity mode                                   | Positive           | Model for separation prediction                        | No                                                                                                                                                                                                                                                       |
| Type of positive (precursor)ion                 | [M+H] <sup>+</sup> | Additional dimension/techniques                        | IMS                                                                                                                                                                                                                                                      |
| Fragments for identification                    |                    | CCS verified by standard                               | No                                                                                                                                                                                                                                                       |
| Fragment name                                   |                    |                                                        |                                                                                                                                                                                                                                                          |
| -(H2O,18)                                       |                    |                                                        |                                                                                                                                                                                                                                                          |
| LCB(-HO)                                        |                    |                                                        |                                                                                                                                                                                                                                                          |
| LCB(-H3O2)                                      |                    |                                                        |                                                                                                                                                                                                                                                          |
| LCB(-CH3O2)                                     |                    |                                                        |                                                                                                                                                                                                                                                          |
| -HG(Hex3,504)                                   |                    |                                                        |                                                                                                                                                                                                                                                          |
| -HG(Hex3,522)                                   |                    |                                                        |                                                                                                                                                                                                                                                          |
| -HG(Hex3,534)                                   |                    |                                                        |                                                                                                                                                                                                                                                          |
| -HG(Hex2,342)                                   |                    |                                                        |                                                                                                                                                                                                                                                          |
| -HG(Hex,180)                                    |                    |                                                        |                                                                                                                                                                                                                                                          |
| Isotope correction at MS1                       | No                 | How was/were the additional dimension(s) used?         | CCS was used (in combination with other parameters) in the identification of lipids, separation of potential isobaric/isomeric interference.                                                                                                             |
| Isotope correction at MS2                       | No                 | Was a model used to predict lipid molecule separation? | No                                                                                                                                                                                                                                                       |
| MS1 verified by standard                        | No                 | Lipid Identification Software                          | Lipid identification was done using MetaboScape 2023b (Bruker Daltonics) utilizing an in-house generated retention time and m/z database, rule-based lipid annotation and the MS DIAL MS/MS library LipidBlast (version 68).                             |
| MS2 verified by standard                        | No                 | Data manipulation                                      | -                                                                                                                                                                                                                                                        |
| Background check at MS1                         | Yes                | Nomenclature for intact lipid molecule                 | Yes                                                                                                                                                                                                                                                      |
| Background check at MS2                         | No                 | Nomenclature for fragment ions                         | N/A                                                                                                                                                                                                                                                      |
| Did you presume assumptions for identification? | No                 | Further identification remarks                         | For lipid identification, the Lipidomics Standards Initiative guidelines were followed, employing lipid class-specific fragments to determine the lipid species and molecular lipid species-specific fragments for the annotation of hydrocarbon chains. |
| Check isomer overlap                            | Yes                |                                                        |                                                                                                                                                                                                                                                          |

## 10) Hex3Cer[M+H]<sup>+</sup> / Lipid quantification

|                            |    |                                |                                                                                                                                                   |
|----------------------------|----|--------------------------------|---------------------------------------------------------------------------------------------------------------------------------------------------|
| Quantitative               | No | Batch correction               | No                                                                                                                                                |
| Normalization to reference | No | Further quantification remarks | The reported lipid abundances were semi-quantitative, calculated by dividing the analyte response by that of the corresponding internal standard. |

## 11) HexCer[M+H]<sup>+</sup> / Lipid identification

|                                                 |                    |                                                        |                                                                                                                                                                                                                                                          |
|-------------------------------------------------|--------------------|--------------------------------------------------------|----------------------------------------------------------------------------------------------------------------------------------------------------------------------------------------------------------------------------------------------------------|
| Lipid class                                     | HexCer             | Limit of detection                                     | No                                                                                                                                                                                                                                                       |
| MS Level for identification                     | MS1, MS2           | RT verified by standard                                | Yes                                                                                                                                                                                                                                                      |
| Identification level                            | Species level      | Separation of isobaric/isomeric interference confirmed | No                                                                                                                                                                                                                                                       |
| Polarity mode                                   | Positive           | Model for separation prediction                        | No                                                                                                                                                                                                                                                       |
| Type of positive (precursor)ion                 | [M+H] <sup>+</sup> | Additional dimension/techniques                        | IMS                                                                                                                                                                                                                                                      |
| Fragments for identification                    |                    | CCS verified by standard                               | No                                                                                                                                                                                                                                                       |
| Fragment name                                   |                    |                                                        |                                                                                                                                                                                                                                                          |
| -(H <sub>2</sub> O,18)                          |                    |                                                        |                                                                                                                                                                                                                                                          |
| LCB(-HO)                                        |                    |                                                        |                                                                                                                                                                                                                                                          |
| LCB(-H <sub>3</sub> O <sub>2</sub> )            |                    |                                                        |                                                                                                                                                                                                                                                          |
| LCB(-CH <sub>3</sub> O <sub>2</sub> )           |                    |                                                        |                                                                                                                                                                                                                                                          |
| -HG(Hex,180)                                    |                    |                                                        |                                                                                                                                                                                                                                                          |
| -HG(Hex,198)                                    |                    |                                                        |                                                                                                                                                                                                                                                          |
| -HG(Hex,162)                                    |                    |                                                        |                                                                                                                                                                                                                                                          |
| Isotope correction at MS1                       | No                 | How was/were the additional dimension(s) used?         | CCS was used (in combination with other parameters) in the identification of lipids, separation of potential isobaric/isomeric interference.                                                                                                             |
| Isotope correction at MS2                       | No                 | Was a model used to predict lipid molecule separation? | No                                                                                                                                                                                                                                                       |
| MS1 verified by standard                        | Yes                | Lipid Identification Software                          | Lipid identification was done using MetaboScape 2023b (Bruker Daltonics) utilising an in-house generated retention time and m/z database, rule-based lipid annotation and the MS DIAL MS/MS library LipidBlast (version 68).                             |
| MS2 verified by standard                        | No                 | Data manipulation                                      | -                                                                                                                                                                                                                                                        |
| Background check at MS1                         | Yes                | Nomenclature for intact lipid molecule                 | Yes                                                                                                                                                                                                                                                      |
| Background check at MS2                         | No                 | Nomenclature for fragment ions                         | N/A                                                                                                                                                                                                                                                      |
| Did you presume assumptions for identification? | No                 | Further identification remarks                         | For lipid identification, the Lipidomics Standards Initiative guidelines were followed, employing lipid class-specific fragments to determine the lipid species and molecular lipid species-specific fragments for the annotation of hydrocarbon chains. |
| Check isomer overlap                            | Yes                |                                                        |                                                                                                                                                                                                                                                          |

## 11) HexCer[M+H]<sup>+</sup> / Lipid quantification

|                            |    |                                |                                                                                                                                                   |
|----------------------------|----|--------------------------------|---------------------------------------------------------------------------------------------------------------------------------------------------|
| Quantitative               | No | Batch correction               | No                                                                                                                                                |
| Normalization to reference | No | Further quantification remarks | The reported lipid abundances were semi-quantitative, calculated by dividing the analyte response by that of the corresponding internal standard. |

## 12) LPE[M-H]<sup>-</sup> / Lipid identification

|                                                 |                    |                                                        |                                                                                                                                                                                                                                                          |
|-------------------------------------------------|--------------------|--------------------------------------------------------|----------------------------------------------------------------------------------------------------------------------------------------------------------------------------------------------------------------------------------------------------------|
| Lipid class                                     | LPE                | Limit of detection                                     | No                                                                                                                                                                                                                                                       |
| MS Level for identification                     | MS1, MS2           | RT verified by standard                                | Yes                                                                                                                                                                                                                                                      |
| Identification level                            | Species level      | Separation of isobaric/isomeric interference confirmed | No                                                                                                                                                                                                                                                       |
| Polarity mode                                   | Negative           | Model for separation prediction                        | No                                                                                                                                                                                                                                                       |
| Type of negative (precursor)ion                 | [M-H] <sup>-</sup> | Additional dimension/techniques                        | IMS                                                                                                                                                                                                                                                      |
| Fragments for identification                    |                    | CCS verified by standard                               | No                                                                                                                                                                                                                                                       |
| Fragment name                                   |                    |                                                        |                                                                                                                                                                                                                                                          |
| -FA1(-H)-(H <sub>2</sub> O)                     |                    |                                                        |                                                                                                                                                                                                                                                          |
| -FA1(-H)                                        |                    |                                                        |                                                                                                                                                                                                                                                          |
| GP(153)                                         |                    |                                                        |                                                                                                                                                                                                                                                          |
| FA1(+O)                                         |                    |                                                        |                                                                                                                                                                                                                                                          |
| Isotope correction at MS1                       | No                 | How was/were the additional dimension(s) used?         | CCS was used (in combination with other parameters) in the identification of lipids, separation of potential isobaric/isomeric interference.                                                                                                             |
| Isotope correction at MS2                       | No                 | Was a model used to predict lipid molecule separation? | No                                                                                                                                                                                                                                                       |
| MS1 verified by standard                        | Yes                | Lipid Identification Software                          | Lipid identification was done using MetaboScape 2023b (Bruker Daltonics) utilising an in-house generated retention time and m/z database, rule-based lipid annotation and the MS DIAL MS/MS library LipidBlast (version 68).                             |
| MS2 verified by standard                        | No                 | Data manipulation                                      | -                                                                                                                                                                                                                                                        |
| Background check at MS1                         | Yes                | Nomenclature for intact lipid molecule                 | Yes                                                                                                                                                                                                                                                      |
| Background check at MS2                         | No                 | Nomenclature for fragment ions                         | N/A                                                                                                                                                                                                                                                      |
| Did you presume assumptions for identification? | No                 | Further identification remarks                         | For lipid identification, the Lipidomics Standards Initiative guidelines were followed, employing lipid class-specific fragments to determine the lipid species and molecular lipid species-specific fragments for the annotation of hydrocarbon chains. |
| Check isomer overlap                            | Yes                |                                                        |                                                                                                                                                                                                                                                          |

## 12) LPE[M-H]- / Lipid quantification

|                            |    |                                |                                                                                                                                                   |
|----------------------------|----|--------------------------------|---------------------------------------------------------------------------------------------------------------------------------------------------|
| Quantitative               | No | Batch correction               | No                                                                                                                                                |
| Normalization to reference | No | Further quantification remarks | The reported lipid abundances were semi-quantitative, calculated by dividing the analyte response by that of the corresponding internal standard. |

## 13) LPE[M+H]+ / Lipid identification

|                                                 |                    |                                                        |                                                                                                                                                                                                                                                          |
|-------------------------------------------------|--------------------|--------------------------------------------------------|----------------------------------------------------------------------------------------------------------------------------------------------------------------------------------------------------------------------------------------------------------|
| Lipid class                                     | LPE                | Limit of detection                                     | No                                                                                                                                                                                                                                                       |
| MS Level for identification                     | MS1, MS2           | RT verified by standard                                | Yes                                                                                                                                                                                                                                                      |
| Identification level                            | Species level      | Separation of isobaric/isomeric interference confirmed | No                                                                                                                                                                                                                                                       |
| Polarity mode                                   | Positive           | Model for separation prediction                        | No                                                                                                                                                                                                                                                       |
| Type of positive (precursor)ion                 | [M+H] <sup>+</sup> | Additional dimension/techniques                        | IMS                                                                                                                                                                                                                                                      |
| Fragments for identification                    |                    | CCS verified by standard                               | No                                                                                                                                                                                                                                                       |
| Fragment name                                   | -HG(PE,141)        |                                                        |                                                                                                                                                                                                                                                          |
| Isotope correction at MS1                       | No                 | How was/were the additional dimension(s) used?         | CCS was used (in combination with other parameters) in the identification of lipids, separation of potential isobaric/isomeric interference.                                                                                                             |
| Isotope correction at MS2                       | No                 | Was a model used to predict lipid molecule separation? | No                                                                                                                                                                                                                                                       |
| MS1 verified by standard                        | Yes                | Lipid Identification Software                          | Lipid identification was done using MetaboScape 2023b (Bruker Daltonics) utilising an in-house generated retention time and m/z database, rule-based lipid annotation and the MS DIAL MS/MS library LipidBlast (version 68).                             |
| MS2 verified by standard                        | No                 | Data manipulation                                      | -                                                                                                                                                                                                                                                        |
| Background check at MS1                         | Yes                | Nomenclature for intact lipid molecule                 | Yes                                                                                                                                                                                                                                                      |
| Background check at MS2                         | No                 | Nomenclature for fragment ions                         | N/A                                                                                                                                                                                                                                                      |
| Did you presume assumptions for identification? | No                 | Further identification remarks                         | For lipid identification, the Lipidomics Standards Initiative guidelines were followed, employing lipid class-specific fragments to determine the lipid species and molecular lipid species-specific fragments for the annotation of hydrocarbon chains. |
| Check isomer overlap                            | Yes                |                                                        |                                                                                                                                                                                                                                                          |

### 13) LPE[M+H]<sup>+</sup> / Lipid quantification

|                            |    |                                |                                                                                                                                                   |
|----------------------------|----|--------------------------------|---------------------------------------------------------------------------------------------------------------------------------------------------|
| Quantitative               | No | Batch correction               | No                                                                                                                                                |
| Normalization to reference | No | Further quantification remarks | The reported lipid abundances were semi-quantitative, calculated by dividing the analyte response by that of the corresponding internal standard. |

### 14) LPE O[M-H]<sup>-</sup> / Lipid identification

|                                                 |                    |                                                        |                                                                                                                                                                                                                                                          |
|-------------------------------------------------|--------------------|--------------------------------------------------------|----------------------------------------------------------------------------------------------------------------------------------------------------------------------------------------------------------------------------------------------------------|
| Lipid class                                     | LPE O              | Limit of detection                                     | No                                                                                                                                                                                                                                                       |
| MS Level for identification                     | MS1, MS2           | RT verified by standard                                | No                                                                                                                                                                                                                                                       |
| Identification level                            | Species level      | Separation of isobaric/isomeric interference confirmed | No                                                                                                                                                                                                                                                       |
| Polarity mode                                   | Negative           | Model for separation prediction                        | No                                                                                                                                                                                                                                                       |
| Type of negative (precursor)ion                 | [M-H] <sup>-</sup> | Additional dimension/techniques                        | IMS                                                                                                                                                                                                                                                      |
| Fragments for identification                    |                    | CCS verified by standard                               | No                                                                                                                                                                                                                                                       |
| Fragment name                                   |                    |                                                        |                                                                                                                                                                                                                                                          |
| -FA1(-H)                                        |                    |                                                        |                                                                                                                                                                                                                                                          |
| GP(153)                                         |                    |                                                        |                                                                                                                                                                                                                                                          |
| Isotope correction at MS1                       | No                 | How was/were the additional dimension(s) used?         | CCS was used (in combination with other parameters) in the identification of lipids, separation of potential isobaric/isomeric interference.                                                                                                             |
| Isotope correction at MS2                       | No                 | Was a model used to predict lipid molecule separation? | No                                                                                                                                                                                                                                                       |
| MS1 verified by standard                        | No                 | Lipid Identification Software                          | Lipid identification was done using MetaboScape 2023b (Bruker Daltonics) utilising an in-house generated retention time and m/z database, rule-based lipid annotation and the MS DIAL MS/MS library LipidBlast (version 68).                             |
| MS2 verified by standard                        | No                 | Data manipulation                                      | -                                                                                                                                                                                                                                                        |
| Background check at MS1                         | Yes                | Nomenclature for intact lipid molecule                 | Yes                                                                                                                                                                                                                                                      |
| Background check at MS2                         | No                 | Nomenclature for fragment ions                         | N/A                                                                                                                                                                                                                                                      |
| Did you presume assumptions for identification? | No                 | Further identification remarks                         | For lipid identification, the Lipidomics Standards Initiative guidelines were followed, employing lipid class-specific fragments to determine the lipid species and molecular lipid species-specific fragments for the annotation of hydrocarbon chains. |
| Check isomer overlap                            | Yes                |                                                        |                                                                                                                                                                                                                                                          |



## 14) LPE O[M-H]- / Lipid quantification

|                            |    |                                |                                                                                                                                                   |
|----------------------------|----|--------------------------------|---------------------------------------------------------------------------------------------------------------------------------------------------|
| Quantitative               | No | Batch correction               | No                                                                                                                                                |
| Normalization to reference | No | Further quantification remarks | The reported lipid abundances were semi-quantitative, calculated by dividing the analyte response by that of the corresponding internal standard. |

## 15) LPE O[M+H]+ / Lipid identification

|                                                 |                    |                                                        |                                                                                                                                                                                                                                                          |
|-------------------------------------------------|--------------------|--------------------------------------------------------|----------------------------------------------------------------------------------------------------------------------------------------------------------------------------------------------------------------------------------------------------------|
| Lipid class                                     | LPE O              | Limit of detection                                     | No                                                                                                                                                                                                                                                       |
| MS Level for identification                     | MS1, MS2           | RT verified by standard                                | No                                                                                                                                                                                                                                                       |
| Identification level                            | Species level      | Separation of isobaric/isomeric interference confirmed | No                                                                                                                                                                                                                                                       |
| Polarity mode                                   | Positive           | Model for separation prediction                        | No                                                                                                                                                                                                                                                       |
| Type of positive (precursor)ion                 | [M+H] <sup>+</sup> | Additional dimension/techniques                        | IMS                                                                                                                                                                                                                                                      |
| Fragments for identification                    |                    | CCS verified by standard                               | No                                                                                                                                                                                                                                                       |
| Fragment name                                   | -HG(PE,141)        |                                                        |                                                                                                                                                                                                                                                          |
| Isotope correction at MS1                       | No                 | How was/were the additional dimension(s) used?         | CCS was used (in combination with other parameters) in the identification of lipids, separation of potential isobaric/isomeric interference.                                                                                                             |
| Isotope correction at MS2                       | No                 | Was a model used to predict lipid molecule separation? | No                                                                                                                                                                                                                                                       |
| MS1 verified by standard                        | No                 | Lipid Identification Software                          | Lipid identification was done using MetaboScape 2023b (Bruker Daltonics) utilising an in-house generated retention time and m/z database, rule-based lipid annotation and the MS DIAL MS/MS library LipidBlast (version 68).                             |
| MS2 verified by standard                        | No                 | Data manipulation                                      | -                                                                                                                                                                                                                                                        |
| Background check at MS1                         | Yes                | Nomenclature for intact lipid molecule                 | Yes                                                                                                                                                                                                                                                      |
| Background check at MS2                         | No                 | Nomenclature for fragment ions                         | N/A                                                                                                                                                                                                                                                      |
| Did you presume assumptions for identification? | No                 | Further identification remarks                         | For lipid identification, the Lipidomics Standards Initiative guidelines were followed, employing lipid class-specific fragments to determine the lipid species and molecular lipid species-specific fragments for the annotation of hydrocarbon chains. |
| Check isomer overlap                            | Yes                |                                                        |                                                                                                                                                                                                                                                          |

## 15) LPE O[M+H]<sup>+</sup> / Lipid quantification

|                            |    |                                |                                                                                                                                                   |
|----------------------------|----|--------------------------------|---------------------------------------------------------------------------------------------------------------------------------------------------|
| Quantitative               | No | Batch correction               | No                                                                                                                                                |
| Normalization to reference | No | Further quantification remarks | The reported lipid abundances were semi-quantitative, calculated by dividing the analyte response by that of the corresponding internal standard. |

## 16) PE[M-H]<sup>-</sup> / Lipid identification

|                                                 |                         |                                                        |                                                                                                                                                                                                                                                          |
|-------------------------------------------------|-------------------------|--------------------------------------------------------|----------------------------------------------------------------------------------------------------------------------------------------------------------------------------------------------------------------------------------------------------------|
| Lipid class                                     | PE                      | Limit of detection                                     | No                                                                                                                                                                                                                                                       |
| MS Level for identification                     | MS1, MS2                | RT verified by standard                                | Yes                                                                                                                                                                                                                                                      |
| Identification level                            | Molecular species level | Separation of isobaric/isomeric interference confirmed | No                                                                                                                                                                                                                                                       |
| Polarity mode                                   | Negative                | Model for separation prediction                        | No                                                                                                                                                                                                                                                       |
| Type of negative (precursor)ion                 | [M-H] <sup>-</sup>      | Additional dimension/techniques                        | IMS                                                                                                                                                                                                                                                      |
| Fragments for identification                    |                         | CCS verified by standard                               | No                                                                                                                                                                                                                                                       |
| Fragment name                                   |                         |                                                        |                                                                                                                                                                                                                                                          |
| HG(PE,196)                                      |                         |                                                        |                                                                                                                                                                                                                                                          |
| GP(153)                                         |                         |                                                        |                                                                                                                                                                                                                                                          |
| FA1(+O)                                         |                         |                                                        |                                                                                                                                                                                                                                                          |
| FA2(+O)                                         |                         |                                                        |                                                                                                                                                                                                                                                          |
| -FA1(+HO)                                       |                         |                                                        |                                                                                                                                                                                                                                                          |
| -FA2(+HO)                                       |                         |                                                        |                                                                                                                                                                                                                                                          |
| -FA1(-H)                                        |                         |                                                        |                                                                                                                                                                                                                                                          |
| -FA2(-H)                                        |                         |                                                        |                                                                                                                                                                                                                                                          |
| Isotope correction at MS1                       | No                      | How was/were the additional dimension(s) used?         | CCS was used (in combination with other parameters) in the identification of lipids, separation of potential isobaric/isomeric interference.                                                                                                             |
| Isotope correction at MS2                       | No                      | Was a model used to predict lipid molecule separation? | No                                                                                                                                                                                                                                                       |
| MS1 verified by standard                        | Yes                     | Lipid Identification Software                          | Lipid identification was done using MetaboScape 2023b (Bruker Daltonics) utilising an in-house generated retention time and m/z database, rule-based lipid annotation and the MS DIAL MS/MS library LipidBlast (version 68).                             |
| MS2 verified by standard                        | No                      | Data manipulation                                      | -                                                                                                                                                                                                                                                        |
| Background check at MS1                         | Yes                     | Nomenclature for intact lipid molecule                 | No                                                                                                                                                                                                                                                       |
| Background check at MS2                         | No                      | Nomenclature for fragment ions                         | N/A                                                                                                                                                                                                                                                      |
| Did you presume assumptions for identification? | No                      | Further identification remarks                         | For lipid identification, the Lipidomics Standards Initiative guidelines were followed, employing lipid class-specific fragments to determine the lipid species and molecular lipid species-specific fragments for the annotation of hydrocarbon chains. |
| Check isomer overlap                            | Yes                     |                                                        |                                                                                                                                                                                                                                                          |

## 16) PE[M-H]- / Lipid quantification

|                            |    |                                |                                                                                                                                                   |
|----------------------------|----|--------------------------------|---------------------------------------------------------------------------------------------------------------------------------------------------|
| Quantitative               | No | Batch correction               | No                                                                                                                                                |
| Normalization to reference | No | Further quantification remarks | The reported lipid abundances were semi-quantitative, calculated by dividing the analyte response by that of the corresponding internal standard. |

## 17) PE[M+H]+ / Lipid identification

|                                                 |                         |                                                        |                                                                                                                                                                                                                                                          |
|-------------------------------------------------|-------------------------|--------------------------------------------------------|----------------------------------------------------------------------------------------------------------------------------------------------------------------------------------------------------------------------------------------------------------|
| Lipid class                                     | PE                      | Limit of detection                                     | No                                                                                                                                                                                                                                                       |
| MS Level for identification                     | MS1, MS2                | RT verified by standard                                | Yes                                                                                                                                                                                                                                                      |
| Identification level                            | Molecular species level | Separation of isobaric/isomeric interference confirmed | No                                                                                                                                                                                                                                                       |
| Polarity mode                                   | Positive                | Model for separation prediction                        | No                                                                                                                                                                                                                                                       |
| Type of positive (precursor)ion                 | [M+H] <sup>+</sup>      | Additional dimension/techniques                        | IMS                                                                                                                                                                                                                                                      |
| Fragments for identification                    |                         | CCS verified by standard                               | No                                                                                                                                                                                                                                                       |
| Fragment name                                   | -HG(PE,141)             |                                                        |                                                                                                                                                                                                                                                          |
|                                                 | FA1                     |                                                        |                                                                                                                                                                                                                                                          |
|                                                 | FA2                     |                                                        |                                                                                                                                                                                                                                                          |
| Isotope correction at MS1                       | No                      | How was/were the additional dimension(s) used?         | CCS was used (in combination with other parameters) in the identification of lipids, separation of potential isobaric/isomeric interference.                                                                                                             |
| Isotope correction at MS2                       | No                      | Was a model used to predict lipid molecule separation? | No                                                                                                                                                                                                                                                       |
| MS1 verified by standard                        | Yes                     | Lipid Identification Software                          | Lipid identification was done using MetaboScape 2023b (Bruker Daltonics) utilising an in-house generated retention time and m/z database, rule-based lipid annotation and the MS DIAL MS/MS library LipidBlast (version 68).                             |
| MS2 verified by standard                        | No                      | Data manipulation                                      | -                                                                                                                                                                                                                                                        |
| Background check at MS1                         | Yes                     | Nomenclature for intact lipid molecule                 | No                                                                                                                                                                                                                                                       |
| Background check at MS2                         | No                      | Nomenclature for fragment ions                         | N/A                                                                                                                                                                                                                                                      |
| Did you presume assumptions for identification? | No                      | Further identification remarks                         | For lipid identification, the Lipidomics Standards Initiative guidelines were followed, employing lipid class-specific fragments to determine the lipid species and molecular lipid species-specific fragments for the annotation of hydrocarbon chains. |
| Check isomer overlap                            | Yes                     |                                                        |                                                                                                                                                                                                                                                          |

## 17) PE[M+H]<sup>+</sup> / Lipid quantification

|                            |    |                                |                                                                                                                                                   |
|----------------------------|----|--------------------------------|---------------------------------------------------------------------------------------------------------------------------------------------------|
| Quantitative               | No | Batch correction               | No                                                                                                                                                |
| Normalization to reference | No | Further quantification remarks | The reported lipid abundances were semi-quantitative, calculated by dividing the analyte response by that of the corresponding internal standard. |

## 18) PE O[M+H]<sup>+</sup> / Lipid identification

|                                                             |                         |                                                        |                                                                                                                                                                                                                                                          |
|-------------------------------------------------------------|-------------------------|--------------------------------------------------------|----------------------------------------------------------------------------------------------------------------------------------------------------------------------------------------------------------------------------------------------------------|
| Lipid class                                                 | PE O                    | Limit of detection                                     | No                                                                                                                                                                                                                                                       |
| MS Level for identification                                 | MS1, MS2                | RT verified by standard                                | No                                                                                                                                                                                                                                                       |
| Identification level                                        | Molecular species level | Separation of isobaric/isomeric interference confirmed | No                                                                                                                                                                                                                                                       |
| Polarity mode                                               | Positive                | Model for separation prediction                        | No                                                                                                                                                                                                                                                       |
| Type of positive (precursor)ion                             | [M+H] <sup>+</sup>      | Additional dimension/techniques                        | IMS                                                                                                                                                                                                                                                      |
| Fragments for identification                                |                         | CCS verified by standard                               | No                                                                                                                                                                                                                                                       |
| <p>Fragment name</p> <p>-HG(PE,141)</p> <p>FA2+(C3H6O2)</p> |                         |                                                        |                                                                                                                                                                                                                                                          |
| Isotope correction at MS1                                   | No                      | How was/were the additional dimension(s) used?         | CCS was used (in combination with other parameters) in the identification of lipids, separation of potential isobaric/isomeric interference.                                                                                                             |
| Isotope correction at MS2                                   | No                      | Was a model used to predict lipid molecule separation? | No                                                                                                                                                                                                                                                       |
| MS1 verified by standard                                    | No                      | Lipid Identification Software                          | Lipid identification was done using MetaboScape 2023b (Bruker Daltonics) utilising an in-house generated retention time and m/z database, rule-based lipid annotation and the MS DIAL MS/MS library LipidBlast (version 68).                             |
| MS2 verified by standard                                    | No                      | Data manipulation                                      | -                                                                                                                                                                                                                                                        |
| Background check at MS1                                     | Yes                     | Nomenclature for intact lipid molecule                 | Yes                                                                                                                                                                                                                                                      |
| Background check at MS2                                     | No                      | Nomenclature for fragment ions                         | N/A                                                                                                                                                                                                                                                      |
| Did you presume assumptions for identification?             | No                      | Further identification remarks                         | For lipid identification, the Lipidomics Standards Initiative guidelines were followed, employing lipid class-specific fragments to determine the lipid species and molecular lipid species-specific fragments for the annotation of hydrocarbon chains. |
| Check isomer overlap                                        | Yes                     |                                                        |                                                                                                                                                                                                                                                          |

## 18) PE O[M+H]<sup>+</sup> / Lipid quantification

|                            |    |                                |                                                                                                                                                   |
|----------------------------|----|--------------------------------|---------------------------------------------------------------------------------------------------------------------------------------------------|
| Quantitative               | No | Batch correction               | No                                                                                                                                                |
| Normalization to reference | No | Further quantification remarks | The reported lipid abundances were semi-quantitative, calculated by dividing the analyte response by that of the corresponding internal standard. |

## 19) PE O[M-H]<sup>-</sup> / Lipid identification

|                                                 |                         |                                                        |                                                                                                                                                                                                                                                          |
|-------------------------------------------------|-------------------------|--------------------------------------------------------|----------------------------------------------------------------------------------------------------------------------------------------------------------------------------------------------------------------------------------------------------------|
| Lipid class                                     | PE O                    | Limit of detection                                     | No                                                                                                                                                                                                                                                       |
| MS Level for identification                     | MS1, MS2                | RT verified by standard                                | No                                                                                                                                                                                                                                                       |
| Identification level                            | Molecular species level | Separation of isobaric/isomeric interference confirmed | No                                                                                                                                                                                                                                                       |
| Polarity mode                                   | Negative                | Model for separation prediction                        | No                                                                                                                                                                                                                                                       |
| Type of negative (precursor) ion                | [M-H] <sup>-</sup>      | Additional dimension/techniques                        | IMS                                                                                                                                                                                                                                                      |
| Fragments for identification                    |                         | CCS verified by standard                               | No                                                                                                                                                                                                                                                       |
| Fragment name                                   |                         |                                                        |                                                                                                                                                                                                                                                          |
| GP(153)                                         |                         |                                                        |                                                                                                                                                                                                                                                          |
| GP(135)                                         |                         |                                                        |                                                                                                                                                                                                                                                          |
| FA2(+O)                                         |                         |                                                        |                                                                                                                                                                                                                                                          |
| -FA2(+HO)                                       |                         |                                                        |                                                                                                                                                                                                                                                          |
| -FA2(-H)                                        |                         |                                                        |                                                                                                                                                                                                                                                          |
| FA2 -(CO)                                       |                         |                                                        |                                                                                                                                                                                                                                                          |
| Isotope correction at MS1                       | No                      | How was/were the additional dimension(s) used?         | CCS was used (in combination with other parameters) in the identification of lipids, separation of potential isobaric/isomeric interference.                                                                                                             |
| Isotope correction at MS2                       | No                      | Was a model used to predict lipid molecule separation? | No                                                                                                                                                                                                                                                       |
| MS1 verified by standard                        | No                      | Lipid Identification Software                          | Lipid identification was done using MetaboScape 2023b (Bruker Daltonics) utilising an in-house generated retention time and m/z database, rule-based lipid annotation and the MS DIAL MS/MS library LipidBlast (version 68).                             |
| MS2 verified by standard                        | No                      | Data manipulation                                      | -                                                                                                                                                                                                                                                        |
| Background check at MS1                         | Yes                     | Nomenclature for intact lipid molecule                 | Yes                                                                                                                                                                                                                                                      |
| Background check at MS2                         | No                      | Nomenclature for fragment ions                         | N/A                                                                                                                                                                                                                                                      |
| Did you presume assumptions for identification? | No                      | Further identification remarks                         | For lipid identification, the Lipidomics Standards Initiative guidelines were followed, employing lipid class-specific fragments to determine the lipid species and molecular lipid species-specific fragments for the annotation of hydrocarbon chains. |
| Check isomer overlap                            | Yes                     |                                                        |                                                                                                                                                                                                                                                          |

## 19) PE O[M-H]- / Lipid quantification

|                            |    |                                |                                                                                                                                                   |
|----------------------------|----|--------------------------------|---------------------------------------------------------------------------------------------------------------------------------------------------|
| Quantitative               | No | Batch correction               | No                                                                                                                                                |
| Normalization to reference | No | Further quantification remarks | The reported lipid abundances were semi-quantitative, calculated by dividing the analyte response by that of the corresponding internal standard. |

## 20) PI[M-H]- / Lipid identification

|                                                 |                         |                                                        |                                                                                                                                                                                                                                                          |
|-------------------------------------------------|-------------------------|--------------------------------------------------------|----------------------------------------------------------------------------------------------------------------------------------------------------------------------------------------------------------------------------------------------------------|
| Lipid class                                     | PI                      | Limit of detection                                     | No                                                                                                                                                                                                                                                       |
| MS Level for identification                     | MS1, MS2                | RT verified by standard                                | Yes                                                                                                                                                                                                                                                      |
| Identification level                            | Molecular species level | Separation of isobaric/isomeric interference confirmed | No                                                                                                                                                                                                                                                       |
| Polarity mode                                   | Negative                | Model for separation prediction                        | No                                                                                                                                                                                                                                                       |
| Type of negative (precursor)ion                 | [M-H]-                  | Additional dimension/techniques                        | IMS                                                                                                                                                                                                                                                      |
| Fragments for identification                    |                         | CCS verified by standard                               | No                                                                                                                                                                                                                                                       |
| Fragment name                                   |                         |                                                        |                                                                                                                                                                                                                                                          |
| -FA1(-H)                                        |                         |                                                        |                                                                                                                                                                                                                                                          |
| FA1(+O)                                         |                         |                                                        |                                                                                                                                                                                                                                                          |
| -FA1(+HO)                                       |                         |                                                        |                                                                                                                                                                                                                                                          |
| -FA2(-H)                                        |                         |                                                        |                                                                                                                                                                                                                                                          |
| FA2(+O)                                         |                         |                                                        |                                                                                                                                                                                                                                                          |
| -FA2(+HO)                                       |                         |                                                        |                                                                                                                                                                                                                                                          |
| HG(PI,241)                                      |                         |                                                        |                                                                                                                                                                                                                                                          |
| Isotope correction at MS1                       | No                      | How was/were the additional dimension(s) used?         | CCS was used (in combination with other parameters) in the identification of lipids, separation of potential isobaric/isomeric interference.                                                                                                             |
| Isotope correction at MS2                       | No                      | Was a model used to predict lipid molecule separation? | No                                                                                                                                                                                                                                                       |
| MS1 verified by standard                        | Yes                     | Lipid Identification Software                          | Lipid identification was done using MetaboScape 2023b (Bruker Daltonics) utilising an in-house generated retention time and m/z database, rule-based lipid annotation and the MS DIAL MS/MS library LipidBlast (version 68).                             |
| MS2 verified by standard                        | No                      | Data manipulation                                      | -                                                                                                                                                                                                                                                        |
| Background check at MS1                         | Yes                     | Nomenclature for intact lipid molecule                 | Yes                                                                                                                                                                                                                                                      |
| Background check at MS2                         | No                      | Nomenclature for fragment ions                         | N/A                                                                                                                                                                                                                                                      |
| Did you presume assumptions for identification? | No                      | Further identification remarks                         | For lipid identification, the Lipidomics Standards Initiative guidelines were followed, employing lipid class-specific fragments to determine the lipid species and molecular lipid species-specific fragments for the annotation of hydrocarbon chains. |
| Check isomer overlap                            | Yes                     |                                                        |                                                                                                                                                                                                                                                          |

## 20) PI[M-H]- / Lipid quantification

|                            |    |                                |                                                                                                                                                   |
|----------------------------|----|--------------------------------|---------------------------------------------------------------------------------------------------------------------------------------------------|
| Quantitative               | No | Batch correction               | No                                                                                                                                                |
| Normalization to reference | No | Further quantification remarks | The reported lipid abundances were semi-quantitative, calculated by dividing the analyte response by that of the corresponding internal standard. |

## 21) PI[M+NH4]+ / Lipid identification

|                                                 |               |                                                        |                                                                                                                                                                                                                                                          |
|-------------------------------------------------|---------------|--------------------------------------------------------|----------------------------------------------------------------------------------------------------------------------------------------------------------------------------------------------------------------------------------------------------------|
| Lipid class                                     | PI            | Limit of detection                                     | No                                                                                                                                                                                                                                                       |
| MS Level for identification                     | MS1, MS2      | RT verified by standard                                | Yes                                                                                                                                                                                                                                                      |
| Identification level                            | Species level | Separation of isobaric/isomeric interference confirmed | No                                                                                                                                                                                                                                                       |
| Polarity mode                                   | Positive      | Model for separation prediction                        | No                                                                                                                                                                                                                                                       |
| Type of positive (precursor)ion                 | [M+NH4]+      | Additional dimension/techniques                        | IMS                                                                                                                                                                                                                                                      |
| Fragments for identification                    |               | CCS verified by standard                               | No                                                                                                                                                                                                                                                       |
| Fragment name                                   | -HG(P1,260)   |                                                        |                                                                                                                                                                                                                                                          |
| Isotope correction at MS1                       | No            | How was/were the additional dimension(s) used?         | CCS was used (in combination with other parameters) in the identification of lipids, separation of potential isobaric/isomeric interference.                                                                                                             |
| Isotope correction at MS2                       | No            | Was a model used to predict lipid molecule separation? | No                                                                                                                                                                                                                                                       |
| MS1 verified by standard                        | Yes           | Lipid Identification Software                          | Lipid identification was done using MetaboScape 2023b (Bruker Daltonics) utilising an in-house generated retention time and m/z database, rule-based lipid annotation and the MS DIAL MS/MS library LipidBlast (version 68).                             |
| MS2 verified by standard                        | No            | Data manipulation                                      | -                                                                                                                                                                                                                                                        |
| Background check at MS1                         | Yes           | Nomenclature for intact lipid molecule                 | Yes                                                                                                                                                                                                                                                      |
| Background check at MS2                         | No            | Nomenclature for fragment ions                         | N/A                                                                                                                                                                                                                                                      |
| Did you presume assumptions for identification? | No            | Further identification remarks                         | For lipid identification, the Lipidomics Standards Initiative guidelines were followed, employing lipid class-specific fragments to determine the lipid species and molecular lipid species-specific fragments for the annotation of hydrocarbon chains. |
| Check isomer overlap                            | Yes           |                                                        |                                                                                                                                                                                                                                                          |

## 21) PI[M+NH4]<sup>+</sup> / Lipid quantification

|                            |    |                                |                                                                                                                                                   |
|----------------------------|----|--------------------------------|---------------------------------------------------------------------------------------------------------------------------------------------------|
| Quantitative               | No | Batch correction               | No                                                                                                                                                |
| Normalization to reference | No | Further quantification remarks | The reported lipid abundances were semi-quantitative, calculated by dividing the analyte response by that of the corresponding internal standard. |

## 22) PS[M-H]<sup>-</sup> / Lipid identification

|                                                 |                                                                                                                                                                                   |                                                        |                                                                                                                                                                                                                                                          |
|-------------------------------------------------|-----------------------------------------------------------------------------------------------------------------------------------------------------------------------------------|--------------------------------------------------------|----------------------------------------------------------------------------------------------------------------------------------------------------------------------------------------------------------------------------------------------------------|
| Lipid class                                     | PS                                                                                                                                                                                | Limit of detection                                     | No                                                                                                                                                                                                                                                       |
| MS Level for identification                     | MS1, MS2                                                                                                                                                                          | RT verified by standard                                | Yes                                                                                                                                                                                                                                                      |
| Identification level                            | Molecular species level                                                                                                                                                           | Separation of isobaric/isomeric interference confirmed | No                                                                                                                                                                                                                                                       |
| Polarity mode                                   | Negative                                                                                                                                                                          | Model for separation prediction                        | No                                                                                                                                                                                                                                                       |
| Type of negative (precursor) ion                | [M-H] <sup>-</sup>                                                                                                                                                                | Additional dimension/techniques                        | IMS                                                                                                                                                                                                                                                      |
| Fragments for identification                    | <p>Fragment name</p> <p>-FA1(-H)-(C3H5NO2)</p> <p>FA1(+O)</p> <p>-FA1(+HO)-(C3H5NO2)</p> <p>-FA2(-H)-(C3H5NO2)</p> <p>FA2(+O)</p> <p>-FA2(+HO)-(C3H5NO2)</p> <p>-(C3H5NO2,87)</p> | CCS verified by standard                               | No                                                                                                                                                                                                                                                       |
| Isotope correction at MS1                       | No                                                                                                                                                                                | How was/were the additional dimension(s) used?         | CCS was used (in combination with other parameters) in the identification of lipids, separation of potential isobaric/isomeric interference.                                                                                                             |
| Isotope correction at MS2                       | No                                                                                                                                                                                | Was a model used to predict lipid molecule separation? | No                                                                                                                                                                                                                                                       |
| MS1 verified by standard                        | Yes                                                                                                                                                                               | Lipid Identification Software                          | Lipid identification was done using MetaboScape 2023b (Bruker Daltonics) utilising an in-house generated retention time and m/z database, rule-based lipid annotation and the MS DIAL MS/MS library LipidBlast (version 68).                             |
| MS2 verified by standard                        | No                                                                                                                                                                                | Data manipulation                                      | -                                                                                                                                                                                                                                                        |
| Background check at MS1                         | Yes                                                                                                                                                                               | Nomenclature for intact lipid molecule                 | Yes                                                                                                                                                                                                                                                      |
| Background check at MS2                         | No                                                                                                                                                                                | Nomenclature for fragment ions                         | N/A                                                                                                                                                                                                                                                      |
| Did you presume assumptions for identification? | No                                                                                                                                                                                | Further identification remarks                         | For lipid identification, the Lipidomics Standards Initiative guidelines were followed, employing lipid class-specific fragments to determine the lipid species and molecular lipid species-specific fragments for the annotation of hydrocarbon chains. |
| Check isomer overlap                            | Yes                                                                                                                                                                               |                                                        |                                                                                                                                                                                                                                                          |



## 22) PS[M-H]- / Lipid quantification

|                            |    |                                |                                                                                                                                                   |
|----------------------------|----|--------------------------------|---------------------------------------------------------------------------------------------------------------------------------------------------|
| Quantitative               | No | Batch correction               | No                                                                                                                                                |
| Normalization to reference | No | Further quantification remarks | The reported lipid abundances were semi-quantitative, calculated by dividing the analyte response by that of the corresponding internal standard. |

## 23) PS[M+H]+ / Lipid identification

|                                                 |                         |                                                        |                                                                                                                                                                                                                                                          |
|-------------------------------------------------|-------------------------|--------------------------------------------------------|----------------------------------------------------------------------------------------------------------------------------------------------------------------------------------------------------------------------------------------------------------|
| Lipid class                                     | PS                      | Limit of detection                                     | No                                                                                                                                                                                                                                                       |
| MS Level for identification                     | MS1, MS2                | RT verified by standard                                | Yes                                                                                                                                                                                                                                                      |
| Identification level                            | Molecular species level | Separation of isobaric/isomeric interference confirmed | No                                                                                                                                                                                                                                                       |
| Polarity mode                                   | Positive                | Model for separation prediction                        | No                                                                                                                                                                                                                                                       |
| Type of positive (precursor)ion                 | [M+H] <sup>+</sup>      | Additional dimension/techniques                        | IMS                                                                                                                                                                                                                                                      |
| Fragments for identification                    |                         | CCS verified by standard                               | No                                                                                                                                                                                                                                                       |
| Fragment name                                   | -HG(PS,185)             |                                                        |                                                                                                                                                                                                                                                          |
| Isotope correction at MS1                       | No                      | How was/were the additional dimension(s) used?         | CCS was used (in combination with other parameters) in the identification of lipids, separation of potential isobaric/isomeric interference.                                                                                                             |
| Isotope correction at MS2                       | No                      | Was a model used to predict lipid molecule separation? | No                                                                                                                                                                                                                                                       |
| MS1 verified by standard                        | Yes                     | Lipid Identification Software                          | Lipid identification was done using MetaboScape 2023b (Bruker Daltonics) utilising an in-house generated retention time and m/z database, rule-based lipid annotation and the MS DIAL MS/MS library LipidBlast (version 68).                             |
| MS2 verified by standard                        | Yes                     | Data manipulation                                      | -                                                                                                                                                                                                                                                        |
| Background check at MS1                         | Yes                     | Nomenclature for intact lipid molecule                 | Yes                                                                                                                                                                                                                                                      |
| Background check at MS2                         | No                      | Nomenclature for fragment ions                         | N/A                                                                                                                                                                                                                                                      |
| Did you presume assumptions for identification? | No                      | Further identification remarks                         | For lipid identification, the Lipidomics Standards Initiative guidelines were followed, employing lipid class-specific fragments to determine the lipid species and molecular lipid species-specific fragments for the annotation of hydrocarbon chains. |
| Check isomer overlap                            | Yes                     |                                                        |                                                                                                                                                                                                                                                          |

## 23) PS[M+H]<sup>+</sup> / Lipid quantification

|                            |    |                                |                                                                                                                                                   |
|----------------------------|----|--------------------------------|---------------------------------------------------------------------------------------------------------------------------------------------------|
| Quantitative               | No | Batch correction               | No                                                                                                                                                |
| Normalization to reference | No | Further quantification remarks | The reported lipid abundances were semi-quantitative, calculated by dividing the analyte response by that of the corresponding internal standard. |

## 24) SM[M+H]<sup>+</sup> / Lipid identification

|                                                 |                         |                                                        |                                                                                                                                                                                                                                                          |
|-------------------------------------------------|-------------------------|--------------------------------------------------------|----------------------------------------------------------------------------------------------------------------------------------------------------------------------------------------------------------------------------------------------------------|
| Lipid class                                     | SM                      | Limit of detection                                     | No                                                                                                                                                                                                                                                       |
| MS Level for identification                     | MS1, MS2                | RT verified by standard                                | Yes                                                                                                                                                                                                                                                      |
| Identification level                            | Molecular species level | Separation of isobaric/isomeric interference confirmed | No                                                                                                                                                                                                                                                       |
| Polarity mode                                   | Positive                | Model for separation prediction                        | No                                                                                                                                                                                                                                                       |
| Type of positive (precursor)ion                 | [M+H] <sup>+</sup>      | Additional dimension/techniques                        | IMS                                                                                                                                                                                                                                                      |
| Fragments for identification                    |                         | CCS verified by standard                               | No                                                                                                                                                                                                                                                       |
| Fragment name                                   |                         |                                                        |                                                                                                                                                                                                                                                          |
|                                                 | HG(PC,184)              |                                                        |                                                                                                                                                                                                                                                          |
|                                                 | LCB(-H3O2)              |                                                        |                                                                                                                                                                                                                                                          |
| Isotope correction at MS1                       | No                      | How was/were the additional dimension(s) used?         | CCS was used (in combination with other parameters) in the identification of lipids, separation of potential isobaric/isomeric interference.                                                                                                             |
| Isotope correction at MS2                       | No                      | Was a model used to predict lipid molecule separation? | No                                                                                                                                                                                                                                                       |
| MS1 verified by standard                        | Yes                     | Lipid Identification Software                          | Lipid identification was done using MetaboScape 2023b (Bruker Daltonics) utilizing an in-house generated retention time and m/z database, rule-based lipid annotation and the MS DIAL MS/MS library LipidBlast (version 68).                             |
| MS2 verified by standard                        | No                      | Data manipulation                                      | -                                                                                                                                                                                                                                                        |
| Background check at MS1                         | Yes                     | Nomenclature for intact lipid molecule                 | Yes                                                                                                                                                                                                                                                      |
| Background check at MS2                         | No                      | Nomenclature for fragment ions                         | N/A                                                                                                                                                                                                                                                      |
| Did you presume assumptions for identification? | No                      | Further identification remarks                         | For lipid identification, the Lipidomics Standards Initiative guidelines were followed, employing lipid class-specific fragments to determine the lipid species and molecular lipid species-specific fragments for the annotation of hydrocarbon chains. |
| Check isomer overlap                            | Yes                     |                                                        |                                                                                                                                                                                                                                                          |

## 24) SM[M+H]<sup>+</sup> / Lipid quantification

|                            |    |                                |                                                                                                                                                   |
|----------------------------|----|--------------------------------|---------------------------------------------------------------------------------------------------------------------------------------------------|
| Quantitative               | No | Batch correction               | No                                                                                                                                                |
| Normalization to reference | No | Further quantification remarks | The reported lipid abundances were semi-quantitative, calculated by dividing the analyte response by that of the corresponding internal standard. |

## 25) TG O[M+NH<sub>4</sub>]<sup>+</sup> / Lipid identification

|                                                 |                                   |                                                        |                                                                                                                                                                                                                                                          |
|-------------------------------------------------|-----------------------------------|--------------------------------------------------------|----------------------------------------------------------------------------------------------------------------------------------------------------------------------------------------------------------------------------------------------------------|
| Lipid class                                     | TG O                              | Limit of detection                                     | No                                                                                                                                                                                                                                                       |
| MS Level for identification                     | MS1, MS2                          | RT verified by standard                                | No                                                                                                                                                                                                                                                       |
| Identification level                            | Species level                     | Separation of isobaric/isomeric interference confirmed | No                                                                                                                                                                                                                                                       |
| Polarity mode                                   | Positive                          | Model for separation prediction                        | Yes                                                                                                                                                                                                                                                      |
| Type of positive (precursor)ion                 | [M+NH <sub>4</sub> ] <sup>+</sup> | Additional dimension/techniques                        | IMS                                                                                                                                                                                                                                                      |
| Fragments for identification                    |                                   | CCS verified by standard                               | Yes                                                                                                                                                                                                                                                      |
| Fragment name                                   |                                   |                                                        |                                                                                                                                                                                                                                                          |
| -FA(+HO) -TG(17)                                |                                   |                                                        |                                                                                                                                                                                                                                                          |
| -TG(17)                                         |                                   |                                                        |                                                                                                                                                                                                                                                          |
| Isotope correction at MS1                       | No                                | How was/were the additional dimension(s) used?         | CCS was used (in combination with other parameters) in the identification of lipids, separation of potential isobaric/isomeric interference.                                                                                                             |
| Isotope correction at MS2                       | No                                | Was a model used to predict lipid molecule separation? | No                                                                                                                                                                                                                                                       |
| MS1 verified by standard                        | No                                | Lipid Identification Software                          | Lipid identification was done using MetaboScape 2023b (Bruker Daltonics) utilising an in-house generated retention time and m/z database, rule-based lipid annotation and the MS DIAL MS/MS library LipidBlast (version 68).                             |
| MS2 verified by standard                        | No                                | Data manipulation                                      | -                                                                                                                                                                                                                                                        |
| Background check at MS1                         | Yes                               | Nomenclature for intact lipid molecule                 | No                                                                                                                                                                                                                                                       |
| Background check at MS2                         | No                                | Nomenclature for fragment ions                         | N/A                                                                                                                                                                                                                                                      |
| Did you presume assumptions for identification? | No                                | Further identification remarks                         | For lipid identification, the Lipidomics Standards Initiative guidelines were followed, employing lipid class-specific fragments to determine the lipid species and molecular lipid species-specific fragments for the annotation of hydrocarbon chains. |
| Check isomer overlap                            | No                                |                                                        |                                                                                                                                                                                                                                                          |

## 25) TG O[M+NH4]<sup>+</sup> / Lipid quantification

|                            |    |                                |                                                                                                                                                   |
|----------------------------|----|--------------------------------|---------------------------------------------------------------------------------------------------------------------------------------------------|
| Quantitative               | No | Batch correction               | No                                                                                                                                                |
| Normalization to reference | No | Further quantification remarks | The reported lipid abundances were semi-quantitative, calculated by dividing the analyte response by that of the corresponding internal standard. |

## 26) LPI[M-H]<sup>-</sup> / Lipid identification

|                                                 |                         |                                                        |                                                                                                                                                                                                                                                          |
|-------------------------------------------------|-------------------------|--------------------------------------------------------|----------------------------------------------------------------------------------------------------------------------------------------------------------------------------------------------------------------------------------------------------------|
| Lipid class                                     | LPI                     | Limit of detection                                     | No                                                                                                                                                                                                                                                       |
| MS Level for identification                     | MS1, MS2                | RT verified by standard                                | No                                                                                                                                                                                                                                                       |
| Identification level                            | Molecular species level | Separation of isobaric/isomeric interference confirmed | No                                                                                                                                                                                                                                                       |
| Polarity mode                                   | Negative                | Model for separation prediction                        | No                                                                                                                                                                                                                                                       |
| Type of negative (precursor)ion                 | [M-H] <sup>-</sup>      | Additional dimension/techniques                        | IMS                                                                                                                                                                                                                                                      |
| Fragments for identification                    |                         | CCS verified by standard                               | No                                                                                                                                                                                                                                                       |
| Fragment name                                   |                         |                                                        |                                                                                                                                                                                                                                                          |
| GP(153)                                         |                         |                                                        |                                                                                                                                                                                                                                                          |
| HG(PI,241)                                      |                         |                                                        |                                                                                                                                                                                                                                                          |
| -FA1(+HO)                                       |                         |                                                        |                                                                                                                                                                                                                                                          |
| FA1(+O)                                         |                         |                                                        |                                                                                                                                                                                                                                                          |
| Isotope correction at MS1                       | No                      | How was/were the additional dimension(s) used?         | CCS was used (in combination with other parameters) in the identification of lipids, separation of potential isobaric/isomeric interference.                                                                                                             |
| Isotope correction at MS2                       | No                      | Was a model used to predict lipid molecule separation? | No                                                                                                                                                                                                                                                       |
| MS1 verified by standard                        | Yes                     | Lipid Identification Software                          | Lipid identification was done using MetaboScape 2023b (Bruker Daltonics) utilizing an in-house generated retention time and m/z database, rule-based lipid annotation and the MS DIAL MS/MS library LipidBlast (version 68).                             |
| MS2 verified by standard                        | No                      | Data manipulation                                      | -                                                                                                                                                                                                                                                        |
| Background check at MS1                         | Yes                     | Nomenclature for intact lipid molecule                 | Yes                                                                                                                                                                                                                                                      |
| Background check at MS2                         | No                      | Nomenclature for fragment ions                         | N/A                                                                                                                                                                                                                                                      |
| Did you presume assumptions for identification? | No                      | Further identification remarks                         | For lipid identification, the Lipidomics Standards Initiative guidelines were followed, employing lipid class-specific fragments to determine the lipid species and molecular lipid species-specific fragments for the annotation of hydrocarbon chains. |
| Check isomer overlap                            | Yes                     |                                                        |                                                                                                                                                                                                                                                          |

## 26) LPI[M-H]- / Lipid quantification

|                            |    |                                |                                                                                                                                                   |
|----------------------------|----|--------------------------------|---------------------------------------------------------------------------------------------------------------------------------------------------|
| Quantitative               | No | Batch correction               | No                                                                                                                                                |
| Normalization to reference | No | Further quantification remarks | The reported lipid abundances were semi-quantitative, calculated by dividing the analyte response by that of the corresponding internal standard. |

## 27) LPS[M-H]- / Lipid identification

|                                                 |                         |                                                        |                                                                                                                                                                                                                                                          |
|-------------------------------------------------|-------------------------|--------------------------------------------------------|----------------------------------------------------------------------------------------------------------------------------------------------------------------------------------------------------------------------------------------------------------|
| Lipid class                                     | LPS                     | Limit of detection                                     | No                                                                                                                                                                                                                                                       |
| MS Level for identification                     | MS1, MS2                | RT verified by standard                                | No                                                                                                                                                                                                                                                       |
| Identification level                            | Molecular species level | Separation of isobaric/isomeric interference confirmed | No                                                                                                                                                                                                                                                       |
| Polarity mode                                   | Negative                | Model for separation prediction                        | No                                                                                                                                                                                                                                                       |
| Type of negative (precursor)ion                 | [M-H]-                  | Additional dimension/techniques                        | IMS                                                                                                                                                                                                                                                      |
| Fragments for identification                    |                         | CCS verified by standard                               | No                                                                                                                                                                                                                                                       |
| Fragment name                                   |                         |                                                        |                                                                                                                                                                                                                                                          |
|                                                 | -(C3H5NO2,87)           |                                                        |                                                                                                                                                                                                                                                          |
|                                                 | FA1(+O)                 |                                                        |                                                                                                                                                                                                                                                          |
|                                                 | GP(153)                 |                                                        |                                                                                                                                                                                                                                                          |
| Isotope correction at MS1                       | No                      | How was/were the additional dimension(s) used?         | CCS was used (in combination with other parameters) in the identification of lipids, separation of potential isobaric/isomeric interference.                                                                                                             |
| Isotope correction at MS2                       | No                      | Was a model used to predict lipid molecule separation? | No                                                                                                                                                                                                                                                       |
| MS1 verified by standard                        | Yes                     | Lipid Identification Software                          | Lipid identification was done using MetaboScape 2023b (Bruker Daltonics) utilizing an in-house generated retention time and m/z database, rule-based lipid annotation and the MS DIAL MS/MS library LipidBlast (version 68).                             |
| MS2 verified by standard                        | No                      | Data manipulation                                      | -                                                                                                                                                                                                                                                        |
| Background check at MS1                         | Yes                     | Nomenclature for intact lipid molecule                 | Yes                                                                                                                                                                                                                                                      |
| Background check at MS2                         | No                      | Nomenclature for fragment ions                         | N/A                                                                                                                                                                                                                                                      |
| Did you presume assumptions for identification? | No                      | Further identification remarks                         | For lipid identification, the Lipidomics Standards Initiative guidelines were followed, employing lipid class-specific fragments to determine the lipid species and molecular lipid species-specific fragments for the annotation of hydrocarbon chains. |
| Check isomer overlap                            | Yes                     |                                                        |                                                                                                                                                                                                                                                          |

## 27) LPS[M-H]- / Lipid quantification

|                            |    |                                |                                                                                                                                                   |
|----------------------------|----|--------------------------------|---------------------------------------------------------------------------------------------------------------------------------------------------|
| Quantitative               | No | Batch correction               | No                                                                                                                                                |
| Normalization to reference | No | Further quantification remarks | The reported lipid abundances were semi-quantitative, calculated by dividing the analyte response by that of the corresponding internal standard. |

## 28) LPS[M+H]+ / Lipid identification

|                                                 |                    |                                                        |                                                                                                                                                                                                                                                          |
|-------------------------------------------------|--------------------|--------------------------------------------------------|----------------------------------------------------------------------------------------------------------------------------------------------------------------------------------------------------------------------------------------------------------|
| Lipid class                                     | LPS                | RT verified by standard                                | No                                                                                                                                                                                                                                                       |
| MS Level for identification                     | MS1                | Separation of isobaric/isomeric interference confirmed | Yes                                                                                                                                                                                                                                                      |
| Identification level                            | Species level      | Model for separation prediction                        | No                                                                                                                                                                                                                                                       |
| Polarity mode                                   | Positive           | Additional dimension/techniques                        | IMS                                                                                                                                                                                                                                                      |
| Type of positive (precursor)ion                 | [M+H] <sup>+</sup> | CCS verified by standard                               | No                                                                                                                                                                                                                                                       |
| Isotope correction at MS1                       | No                 | How was/were the additional dimension(s) used?         | CCS was used (in combination with other parameters) in the identification of lipids, separation of potential isobaric/isomeric interference.                                                                                                             |
| MS1 verified by standard                        | No                 | Was a model used to predict lipid molecule separation? | No                                                                                                                                                                                                                                                       |
| Background check at MS1                         | Yes                | Lipid Identification Software                          | Lipid identification was done using MetaboScape 2023b (Bruker Daltonics) utilizing an in-house generated retention time and m/z database, rule-based lipid annotation and the MS DIAL MS/MS library LipidBlast (version 68).                             |
| Did you presume assumptions for identification? | No                 | Data manipulation                                      | -                                                                                                                                                                                                                                                        |
| Check isomer overlap                            | Yes                | Nomenclature for intact lipid molecule                 | Yes                                                                                                                                                                                                                                                      |
| Limit of detection                              | No                 | Further identification remarks                         | For lipid identification, the Lipidomics Standards Initiative guidelines were followed, employing lipid class-specific fragments to determine the lipid species and molecular lipid species-specific fragments for the annotation of hydrocarbon chains. |

## 28) LPS[M+H]+ / Lipid quantification

|                            |    |                                |                                                                                                                                                   |
|----------------------------|----|--------------------------------|---------------------------------------------------------------------------------------------------------------------------------------------------|
| Quantitative               | No | Batch correction               | No                                                                                                                                                |
| Normalization to reference | No | Further quantification remarks | The reported lipid abundances were semi-quantitative, calculated by dividing the analyte response by that of the corresponding internal standard. |

## 29) SLBPA[M-H]<sup>-</sup> / Lipid identification

|                                                 |                    |                                                        |                                                                                                                                                                                                                                                          |
|-------------------------------------------------|--------------------|--------------------------------------------------------|----------------------------------------------------------------------------------------------------------------------------------------------------------------------------------------------------------------------------------------------------------|
| Lipid class                                     | SLBPA              | RT verified by standard                                | No                                                                                                                                                                                                                                                       |
| MS Level for identification                     | MS1                | Separation of isobaric/isomeric interference confirmed | No                                                                                                                                                                                                                                                       |
| Identification level                            | Species level      | Model for separation prediction                        | No                                                                                                                                                                                                                                                       |
| Polarity mode                                   | Negative           | Additional dimension/techniques                        | IMS                                                                                                                                                                                                                                                      |
| Type of negative (precursor)ion                 | [M-H] <sup>-</sup> | CCS verified by standard                               | No                                                                                                                                                                                                                                                       |
| Isotope correction at MS1                       | No                 | How was/were the additional dimension(s) used?         | CCS was used (in combination with other parameters) in the identification of lipids, separation of potential isobaric/isomeric interference.                                                                                                             |
| MS1 verified by standard                        | No                 | Was a model used to predict lipid molecule separation? | No                                                                                                                                                                                                                                                       |
| Background check at MS1                         | No                 | Lipid Identification Software                          | Lipid identification was done using MetaboScape 2023b (Bruker Daltonics) utilising an in-house generated retention time and m/z database, rule-based lipid annotation and the MS DIAL MS/MS library LipidBlast (version 68).                             |
| Did you presume assumptions for identification? | No                 | Data manipulation                                      | -                                                                                                                                                                                                                                                        |
| Check isomer overlap                            | No                 | Nomenclature for intact lipid molecule                 | No                                                                                                                                                                                                                                                       |
| Limit of detection                              | No                 | Further identification remarks                         | For lipid identification, the Lipidomics Standards Initiative guidelines were followed, employing lipid class-specific fragments to determine the lipid species and molecular lipid species-specific fragments for the annotation of hydrocarbon chains. |

## 29) SLBPA[M-H]<sup>-</sup> / Lipid quantification

|                            |    |                                |                                                                                                                                                   |
|----------------------------|----|--------------------------------|---------------------------------------------------------------------------------------------------------------------------------------------------|
| Quantitative               | No | Batch correction               | No                                                                                                                                                |
| Normalization to reference | No | Further quantification remarks | The reported lipid abundances were semi-quantitative, calculated by dividing the analyte response by that of the corresponding internal standard. |
